# Supplementary material for: The Short-Term Effects of Heavy Thinning on Selected Soil Carbon Pools and Microbial Activity in a Young Aleppo Pine Forest
Source: MDPI journal article supplement (doi:10.3390/f15040658), 2024-04-04
Supplement: s1 [file s1]

## Supplementary Material

**Table S1.** Stoniness, root weight and elemental composition of macronutrients (Ca, Mg, S), micronutrients (Fe, Cu, Mn, Zn) and heavy metals (Cd, As) for each zone studied (zI and zII) at depths of 0-5 cm and 5-20 cm. Data are presented as mean  $\pm$  standard deviation ( $n = 3$  for zI and  $n = 5$  for zII) corresponding to the sampling carried out in March 2013 at the beginning of the study.

| Parameters                                  | 0-5 cm depth                         |                                      | 5-20 cm depth                         |                                       |
|---------------------------------------------|--------------------------------------|--------------------------------------|---------------------------------------|---------------------------------------|
|                                             | zI                                   | zII                                  | zI                                    | zII                                   |
| Stoniness (g 100 g <sup>-1</sup> )          | 45.32 $\pm$ 9.67 a                   | 25.86 $\pm$ 22.03 a                  | <b>40.66 <math>\pm</math> 13.81 b</b> | 8.09 $\pm$ 8.24 a                     |
| Root weight (g 100 g <sup>-1</sup> )        | <b>2.19 <math>\pm</math> 0.63 b</b>  | 1.24 $\pm$ 0.44 a                    | 2.85 $\pm$ 2.32 a                     | 2.93 $\pm$ 0.82 a                     |
| Corg (g kg <sup>-1</sup> soil) <sup>1</sup> | <b>78.76 <math>\pm</math> 5.62 b</b> | 34.99 $\pm$ 11.23 a                  | 35.61 $\pm$ 15.54 a                   | 16.20 $\pm$ 8.38 a                    |
| C (g 100 g <sup>-1</sup> )                  | 10.25 $\pm$ 2.51 a                   | 7.50 $\pm$ 0.90 a                    | 7.37 $\pm$ 1.05 a                     | 6.70 $\pm$ 1.07 a                     |
| N (g 100 g <sup>-1</sup> )                  | <b>0.52 <math>\pm</math> 0.10 b</b>  | 0.22 $\pm$ 0.08 a                    | <b>0.36 <math>\pm</math> 0.05 b</b>   | 0.15 $\pm$ 0.09 a                     |
| C/N                                         | 19.49 $\pm$ 1.76 a                   | <b>38.11 <math>\pm</math> 9.36 b</b> | 20.35 $\pm$ 4.31 a                    | <b>67.55 <math>\pm</math> 15.64 b</b> |
| Ca (g 100 g <sup>-1</sup> )                 | 4.71 $\pm$ 2.81 a                    | <b>13.61 <math>\pm</math> 3.19 b</b> | 7.11 $\pm$ 5.76 a                     | 15.55 $\pm$ 4.19 a                    |
| Mg (g 100 g <sup>-1</sup> )                 | 1.07 $\pm$ 0.01 a                    | <b>2.12 <math>\pm</math> 0.51 b</b>  | 1.15 $\pm$ 0.05 a                     | <b>2.16 <math>\pm</math> 0.66 b</b>   |
| S (mg kg <sup>-1</sup> )                    | 0.09 $\pm$ 0.04 a                    | <b>0.14 <math>\pm</math> 0.01 b</b>  | 0.10 $\pm$ 0.05 a                     | 0.15 $\pm$ 0.02 a                     |
| Fe (g kg <sup>-1</sup> )                    | 38.60 $\pm$ 7.68 a                   | 30.58 $\pm$ 2.84 a                   | <b>40.35 <math>\pm</math> 8.90 b</b>  | 28.52 $\pm$ 4.05 a                    |
| Cu (mg kg <sup>-1</sup> )                   | <b>23.09 <math>\pm</math> 2.26 b</b> | 13.64 $\pm$ 5.10 a                   | <b>22.90 <math>\pm</math> 4.16 b</b>  | 14.81 $\pm$ 4.12 a                    |
| Mn (mg kg <sup>-1</sup> )                   | <b>899 <math>\pm</math> 176 b</b>    | 406 $\pm$ 160 a                      | <b>887 <math>\pm</math> 166 b</b>     | 391 $\pm$ 74 a                        |
| Zn (mg kg <sup>-1</sup> )                   | <b>331 <math>\pm</math> 52 b</b>     | 56 $\pm$ 38 a                        | <b>334 <math>\pm</math> 76 b</b>      | 48 $\pm$ 23 a                         |
| Mo (mg kg <sup>-1</sup> )                   | 1.12 $\pm$ 0.13 a                    | 0.79 $\pm$ 0.21 a                    | <b>1.17 <math>\pm</math> 0.18 b</b>   | 0.76 $\pm$ 0.16 a                     |
| Cd (mg kg <sup>-1</sup> )                   | <b>0.67 <math>\pm</math> 0.14 b</b>  | 0.20 $\pm$ 0.13 a                    | <b>0.63 <math>\pm</math> 0.09 b</b>   | 0.20 $\pm$ 0.12 a                     |
| As (mg kg <sup>-1</sup> )                   | 21.34 $\pm$ 4.38 a                   | 7.08 $\pm$ 9.08 a                    | <b>22.87 <math>\pm</math> 4.74 b</b>  | 7.03 $\pm$ 6.86 a                     |

<sup>1</sup> Corg: organic carbon. Different lower case letters for each parameter in a column indicate significant differences, shown in bold, between the two zones at each depth at  $p \leq 0.05$ .

**Table S2.** Soil chemical and physical properties for each zone (zI, zII) at depth of 0-15 cm. Data are means and standard deviations of samples ( $n = 9$  and  $8$  for zI and zII, respectively) taken in May 2014.

| Zones | pH                                  | EC 1:5 <sup>1</sup><br>(dS m <sup>-1</sup> ) | Carbonates<br>(%)                    | SOC <sup>1</sup><br>(g kg <sup>-1</sup> ) | WHC <sup>1</sup><br>(%)              | Sand<br>(%)                          | Silt<br>(%)                          | Clay<br>(%)        | Texture   |
|-------|-------------------------------------|----------------------------------------------|--------------------------------------|-------------------------------------------|--------------------------------------|--------------------------------------|--------------------------------------|--------------------|-----------|
| zI    | 7.96 $\pm$ 0.12 a                   | <b>0.286 <math>\pm</math> 0.033 b</b>        | 20.47 $\pm$ 6.80 a                   | <b>81.48 <math>\pm</math> 13.82 b</b>     | <b>83.58 <math>\pm</math> 8.65 b</b> | 30.03 $\pm$ 6.24 a                   | <b>38.31 <math>\pm</math> 2.86 b</b> | 31.65 $\pm$ 5.00 a | Clay loam |
| zII   | <b>8.18 <math>\pm</math> 0.16 b</b> | 0.190 $\pm$ 0.060 a                          | <b>36.64 <math>\pm</math> 8.35 b</b> | 35.05 $\pm$ 15.42 a                       | 66.19 $\pm$ 4.70 a                   | <b>37.56 <math>\pm</math> 4.25 b</b> | 32.34 $\pm$ 2.54 a                   | 30.10 $\pm$ 3.65 a | Clay loam |

<sup>1</sup> EC: electrical conductivity. SOC: soil organic carbon. WHC: water holding capacity. Different lower case letters for each parameter in a column indicate significant differences, shown in bold, between the two zones at  $p \leq 0.05$ .

**Table S3.** Spearman's correlation matrix between several soil carbon fractions (soil organic carbon in mineral soil – SOC<sub>ms</sub>, water soluble organic carbon in forest floor – WSOC<sub>ff</sub> and mineral soil – WSOC<sub>ms</sub>, and microbial biomass carbon in mineral soil – MBC<sub>ms</sub>), gravimetric water content in forest floor – GWC<sub>ff</sub> and mineral soil – GWC<sub>ms</sub>, and climate parameters (ambient temperature – Temp<sub>amb</sub> and WET temperature – Temp<sub>WET</sub>) separating data by thinning treatment (T) and control (C) plots.

|                      |                     |              |                      |                     |                     |                      |                     |                     |                      |                     |                     |                      |                     |
|----------------------|---------------------|--------------|----------------------|---------------------|---------------------|----------------------|---------------------|---------------------|----------------------|---------------------|---------------------|----------------------|---------------------|
|                      | GWC <sub>ms_T</sub> |              |                      |                     |                     |                      |                     |                     |                      |                     |                     |                      |                     |
| SOC <sub>ms_T</sub>  | <b>0.424</b>        |              | SOC <sub>ms_T</sub>  |                     |                     |                      |                     |                     |                      |                     |                     |                      |                     |
| WSOC <sub>ms_T</sub> | 0.062               | <b>0.555</b> | WSOC <sub>ms_T</sub> |                     |                     |                      |                     |                     |                      |                     |                     |                      |                     |
| MBC <sub>ms_T</sub>  | 0.655               | <b>0.753</b> | 0.180                | MBC <sub>ms_T</sub> |                     |                      |                     |                     |                      |                     |                     |                      |                     |
| GWC <sub>ff_T</sub>  | <b>0.669</b>        | –0.175       | <b>–0.448</b>        | 0.333               | GWC <sub>ff_T</sub> |                      |                     |                     |                      |                     |                     |                      |                     |
| WSOC <sub>ff_T</sub> | <b>–0.559</b>       | –0.343       | –0.395               | 0.324               | –0.246              | WSOC <sub>ff_T</sub> |                     |                     |                      |                     |                     |                      |                     |
| GWC <sub>ms_C</sub>  | <b>0.889</b>        | 0.383        | 0.076                | <b>0.846</b>        | <b>0.616</b>        | <b>–0.481</b>        | GWC <sub>ms_C</sub> |                     |                      |                     |                     |                      |                     |
| SOC <sub>ms_C</sub>  | 0.367               | <b>0.850</b> | <b>0.555</b>         | 0.575               | –0.291              | –0.328               | <b>0.420</b>        | SOC <sub>ms_C</sub> |                      |                     |                     |                      |                     |
| WSOC <sub>ms_C</sub> | –0.267              | <b>0.413</b> | <b>0.725</b>         | –0.351              | <b>–0.698</b>       | –0.120               | –0.289              | 0.389               | WSOC <sub>ms_C</sub> |                     |                     |                      |                     |
| MBC <sub>ms_C</sub>  | 0.328               | 0.258        | 0.027                | 0.262               | 0.113               | –0.027               | 0.335               | 0.158               | –0.433               | MBC <sub>ms_C</sub> |                     |                      |                     |
| GWC <sub>ff_C</sub>  | <b>0.599</b>        | –0.263       | <b>–0.467</b>        | 0.266               | <b>0.935</b>        | –0.187               | <b>0.650</b>        | –0.283              | <b>–0.747</b>        | 0.148               | GWC <sub>ff_C</sub> |                      |                     |
| WSOC <sub>ff_C</sub> | –0.241              | –0.285       | <b>–0.501</b>        | 0.055               | 0.121               | <b>0.648</b>         | –0.262              | –0.356              | –0.259               | 0.148               | 0.145               | WSOC <sub>ff_C</sub> |                     |
| Temp <sub>amb</sub>  | –0.349              | 0.028        | 0.308                | –0.393              | <b>–0.449</b>       | –0.047               | –0.196              | 0.109               | 0.190                | –0.337              | –0.402              | –0.309               | Temp <sub>amb</sub> |
| Temp <sub>WET</sub>  | –0.339              | 0.035        | 0.190                | –0.217              | –0.384              | 0.179                | –0.165              | 0.190               | 0.037                | –0.133              | –0.318              | –0.144               | <b>0.893</b>        |

Values in bold correspond to significant results at  $p \leq 0.05$ . Colour scale from red (1) to blue (–1).

**Table S4.** Spearman's correlation matrix between several soil carbon fractions (soil organic carbon in mineral soil – SOC<sub>ms</sub>, water soluble organic carbon in forest floor – WSOC<sub>ff</sub> and mineral soil – WSOC<sub>ms</sub>, and microbial biomass carbon in mineral soil – MBC<sub>ms</sub>), gravimetric water content in forest floor – GWC<sub>ff</sub> and mineral soil – GWC<sub>ms</sub>, and climate parameters (ambient temperature – Temp<sub>amb</sub> and WET temperature – Temp<sub>WET</sub>) organizing data by zone I (zI) and zone II (zII).

|                        |                      |                      |                       |                      |                      |                       |                       |                       |                        |                       |                       |                        |                     |  |
|------------------------|----------------------|----------------------|-----------------------|----------------------|----------------------|-----------------------|-----------------------|-----------------------|------------------------|-----------------------|-----------------------|------------------------|---------------------|--|
|                        | GWC <sub>ms_zI</sub> |                      |                       |                      |                      |                       |                       |                       |                        |                       |                       |                        |                     |  |
| SOC <sub>ms_zI</sub>   | –0.017               | SOC <sub>ms_zI</sub> |                       |                      |                      |                       |                       |                       |                        |                       |                       |                        |                     |  |
| WSOC <sub>ms_zI</sub>  | <b>–0.493</b>        | 0.290                | WSOC <sub>ms_zI</sub> |                      |                      |                       |                       |                       |                        |                       |                       |                        |                     |  |
| MBC <sub>ms_zI</sub>   | 0.337                | –0.499               | –0.396                | MBC <sub>ms_zI</sub> |                      |                       |                       |                       |                        |                       |                       |                        |                     |  |
| GWC <sub>ff_zI</sub>   | <b>0.839</b>         | –0.135               | <b>–0.689</b>         | 0.393                | GWC <sub>ff_zI</sub> |                       |                       |                       |                        |                       |                       |                        |                     |  |
| WSOC <sub>ff_zI</sub>  | <b>–0.429</b>        | –0.134               | 0.168                 | 0.626                | –0.338               | WSOC <sub>ff_zI</sub> |                       |                       |                        |                       |                       |                        |                     |  |
| GWC <sub>ms_zII</sub>  | <b>0.898</b>         | –0.032               | <b>–0.491</b>         | 0.215                | <b>0.786</b>         | <b>–0.455</b>         | GWC <sub>ms_zII</sub> |                       |                        |                       |                       |                        |                     |  |
| SOC <sub>ms_zII</sub>  | 0.143                | –0.041               | 0.030                 | –0.057               | –0.008               | 0.104                 | 0.286                 | SOC <sub>ms_zII</sub> |                        |                       |                       |                        |                     |  |
| WSOC <sub>ms_zII</sub> | –0.249               | 0.326                | <b>0.677</b>          | <b>–0.706</b>        | <b>–0.431</b>        | –0.229                | –0.352                | 0.019                 | WSOC <sub>ms_zII</sub> |                       |                       |                        |                     |  |
| MBC <sub>ms_zII</sub>  | 0.532                | –0.366               | –0.481                | 0.571                | <b>0.738</b>         | 0.636                 | 0.448                 | 0.350                 | <b>–0.730</b>          | MBC <sub>ms_zII</sub> |                       |                        |                     |  |
| GWC <sub>ff_zII</sub>  | <b>0.747</b>         | –0.233               | <b>–0.725</b>         | 0.474                | <b>0.932</b>         | –0.396                | <b>0.822</b>          | 0.001                 | <b>–0.490</b>          | 0.637                 | GWC <sub>ff_zII</sub> |                        |                     |  |
| WSOC <sub>ff_zII</sub> | –0.346               | –0.241               | –0.175                | 0.039                | –0.094               | <b>0.576</b>          | –0.323                | 0.071                 | –0.248                 | 0.455                 | –0.128                | WSOC <sub>ff_zII</sub> |                     |  |
| Temp <sub>amb</sub>    | –0.282               | <b>0.561</b>         | <b>0.439</b>          | –0.374               | <b>–0.431</b>        | –0.065                | –0.305                | –0.252                | 0.281                  | <b>–0.599</b>         | <b>–0.416</b>         | –0.267                 | Temp <sub>amb</sub> |  |
| Temp <sub>WET</sub>    | <b>–0.389</b>        | 0.369                | 0.276                 | –0.175               | <b>–0.436</b>        | 0.152                 | –0.303                | –0.228                | –0.016                 | –0.478                | –0.330                | 0.042                  | <b>0.870</b>        |  |
